# Supplementary material for: Engineering of mCherry variants with long Stokes shift, red-shifted fluorescence, and low cytotoxicity
Source: PubMed Central journal article supplement (PMC5328254; doi:10.1371/journal.pone.0171257), 2017-02-27
Supplement: pone.0171257.s001.pdf [file pone.0171257.s001.pdf]

**S1 Table. Amino acid substitutions in new RFPs described in this work.**

| <b>Protein name</b> | <b>Additional mutations</b>                            |
|---------------------|--------------------------------------------------------|
| mCherry2            | mCherry + K92N + K138C + K139R + S147T + N196D + T202L |
| mCherry1.5          | mCherry + K92N + K138C + K139R + N196D                 |
| LSSmCherry0.1       | mCherry2 + I161S + Q163E                               |
| LSSmCherry0.2       | LSSmCherry0.1 + W143L                                  |
| LSSmCherry1         | LSSmCherry0.2 + A6T + A217S                            |
| RDSmCherry0.1       | mCherry2 + I161G + Q163G                               |
| RDSmCherry0.2       | RDSmCherry0.1 + V195C/I197Y                            |
| RDSmCherry0.5       | RDSmCherry0.2 + V16S + A44C + A145P                    |
| RDSmCherry1         | RDSmCherry0.5 + Y197I                                  |
